# Supplementary material for: Insights into the Interaction between the Biocontrol Agent Bacillus amyloliquefaciens QST 713, the Pathogen Monilinia fructicola and Peach Fruit
Source: MDPI journal article supplement (doi:10.3390/agronomy14040771), 2024-04-09
Supplement: s1 [file s1]

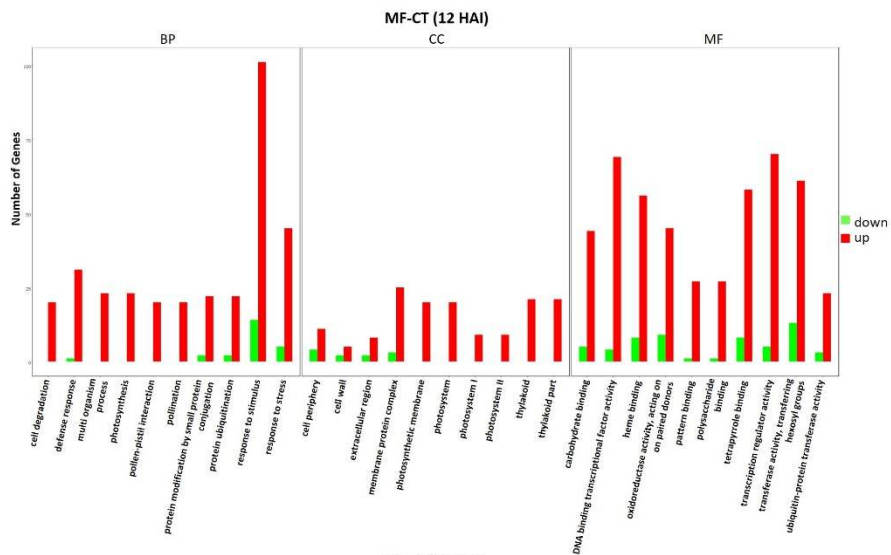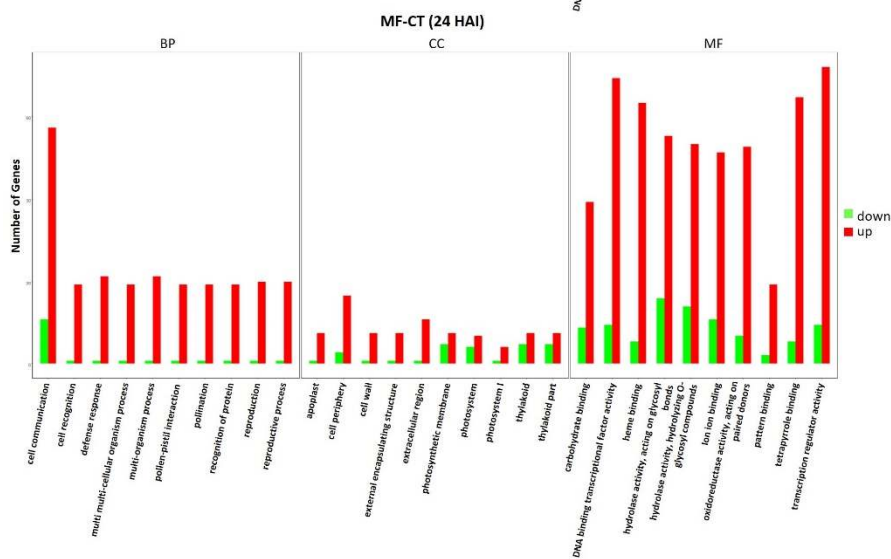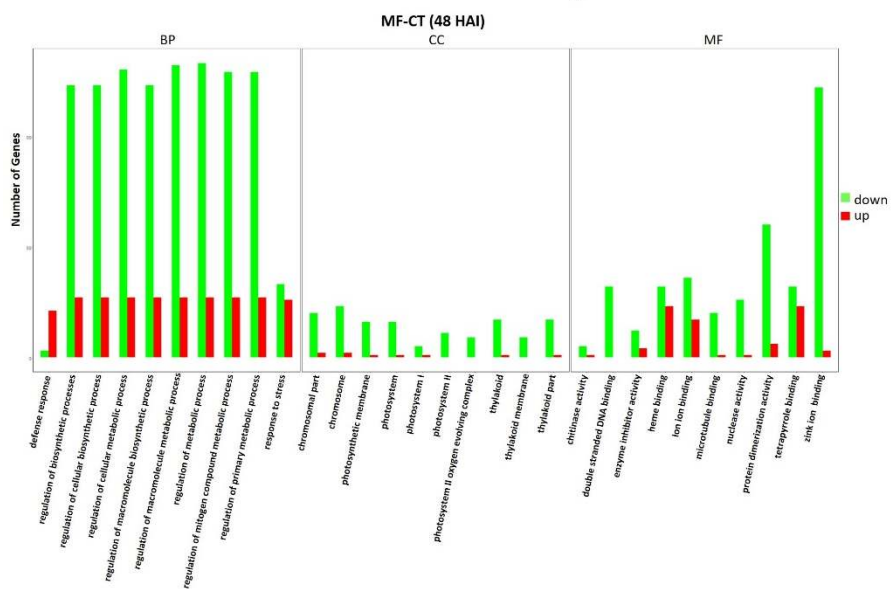

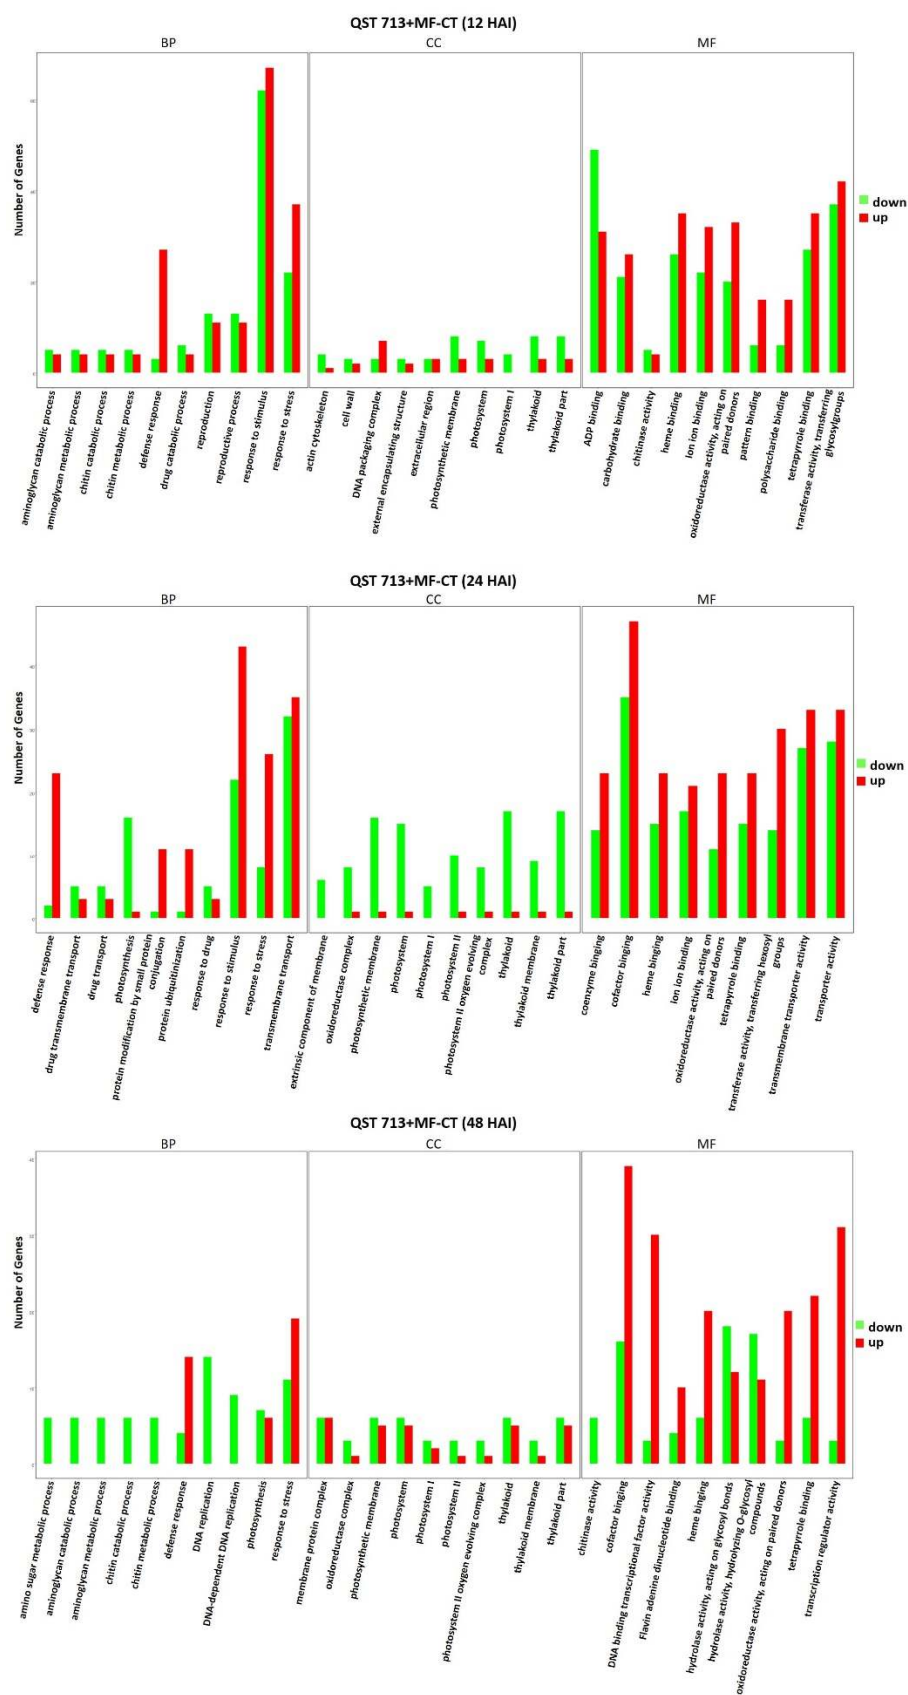

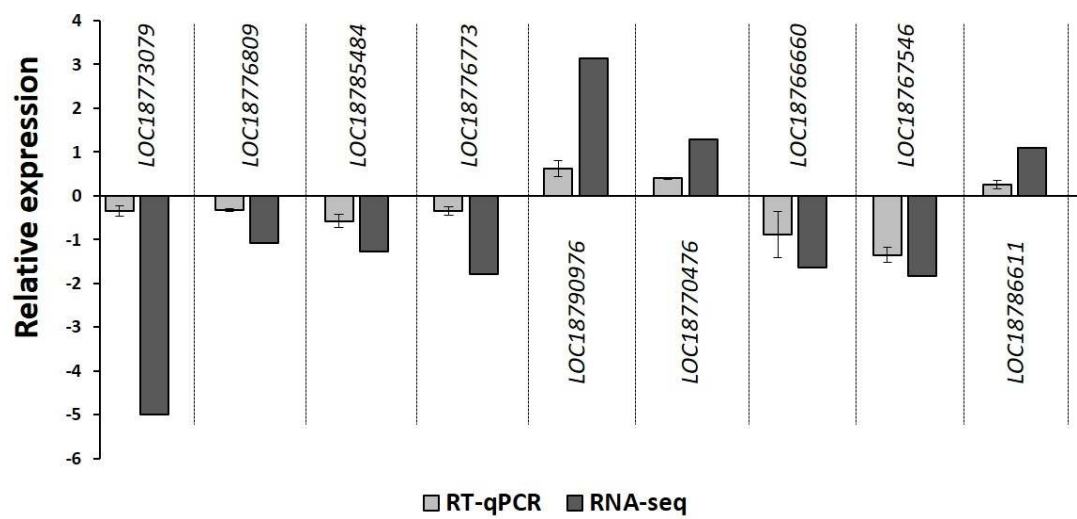

**Figure S2.** Correlation of RNA-seq and RT-qPCR data after *M. fructicola* inoculation on peach fruits at 24 HAI.
